# Supplementary material for: IL-6 and IL-8 secreted by tumour cells impair the function of NK cells via the STAT3 pathway in oesophageal squamous cell carcinoma
Source: Springer Nature journal article supplement (doi:10.1186/s13046-019-1310-0), 2019-07-19

S2

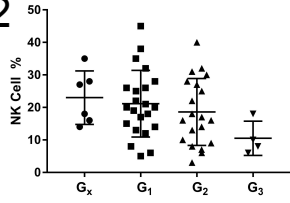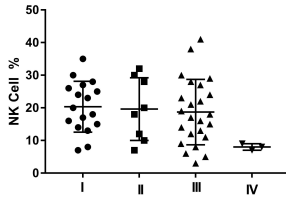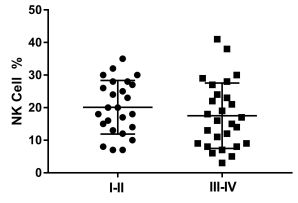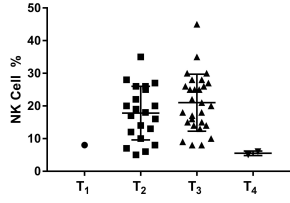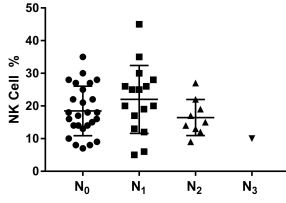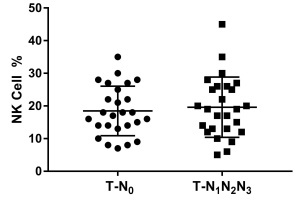

Supplement: MOESM2 [file 16965584]
